# Supplementary material for: Carbonaceous aerosol source apportionment using the aethalometermodel – Evaluation by radiocarbon and levoglucosan analysis at arural background site in southern Sweden
Source: Copernicus journal article supplement (doi:10.5194/acp-2016-1005), 2016-12-15
Supplement: Supplementary file 1 [file acp-2016-1005-supplement.zip]

Archive with 2 entries (2 files):
- Martinsson et al. 2016_data.xlsx
- Martinsson et al. 2016_SI.pdf
