# Supplementary material for: Carbonaceous aerosol source apportionment using the aethalometermodel – Evaluation by radiocarbon and levoglucosan analysis at arural background site in southern Sweden
Source: Copernicus journal article supplement (doi:10.5194/acp-2016-1005), 2016-12-15
Supplement: Supplementary file 1 [file Martinsson et al. 2016_data.xlsx]

## Sheet: Aethalometer data
Date	Abs 370 (m-1)	Abs 470 (m-1)	Abs 520 (m-1)	Abs 590 (m-1)	Abs 660 (m-1)	Abs 880 (m-1)	Abs 950 (m-1)
2014-06-12	2.74512e-06	2.14301e-06	1.86564e-06	1.63568e-06	1.42098e-06	1.09498e-06	1.07496e-06
2014-06-13	1.22152e-06	9.01066e-07	7.73472e-07	6.7164e-07	5.80206e-07	4.43899e-07	4.36113e-07
2014-06-14	1.31799e-06	9.29409e-07	7.91712e-07	6.80309e-07	5.86347e-07	4.35708e-07	4.28834e-07
2014-06-15	1.33756e-06	9.17434e-07	7.77496e-07	6.63703e-07	5.69547e-07	4.18765e-07	4.11203e-07
2014-06-16	3.80102e-06	2.81087e-06	2.45881e-06	2.16621e-06	1.8397e-06	1.44131e-06	1.38199e-06
2014-06-17	1.27824e-06	9.17292e-07	7.93264e-07	6.86686e-07	5.84073e-07	4.44018e-07	4.24794e-07
2014-06-18	3.63023e-06	2.63911e-06	2.29747e-06	2.02054e-06	1.72756e-06	1.3452e-06	1.3009e-06
2014-06-19	1.86863e-06	1.30388e-06	1.12701e-06	9.95245e-07	8.51357e-07	6.71134e-07	6.46865e-07
2014-06-20	1.05647e-06	7.34088e-07	6.31386e-07	5.50179e-07	4.71245e-07	3.56567e-07	3.45115e-07
2014-06-21	1.3657e-06	9.01803e-07	7.69986e-07	6.76602e-07	5.71202e-07	4.40694e-07	4.21973e-07
2014-06-22	1.82236e-06	1.11854e-06	9.61008e-07	8.41367e-07	7.18035e-07	5.60017e-07	5.40104e-07
2014-06-23	1.11114e-06	8.0074e-07	6.92478e-07	6.0594e-07	5.13971e-07	4.03063e-07	3.84395e-07
2014-06-24	1.24122e-06	9.39001e-07	8.14543e-07	7.12669e-07	5.99039e-07	4.57054e-07	4.34596e-07
2014-06-25	1.52757e-06	1.10324e-06	9.5484e-07	8.35224e-07	7.04106e-07	5.41127e-07	5.14639e-07
2014-06-26	3.01797e-06	2.16397e-06	1.87875e-06	1.6615e-06	1.41253e-06	1.09865e-06	1.05054e-06
2014-06-27	2.99024e-06	2.12427e-06	1.84133e-06	1.61999e-06	1.37009e-06	1.04446e-06	1.00037e-06
2014-06-28	5.94289e-06	4.261e-06	3.71778e-06	3.29007e-06	2.78196e-06	2.14499e-06	2.04576e-06
2014-06-29	4.29724e-06	3.2241e-06	2.82445e-06	2.48943e-06	2.10213e-06	1.61599e-06	1.53582e-06
2014-06-30	2.10127e-06	1.48784e-06	1.29609e-06	1.13646e-06	9.59928e-07	7.29414e-07	6.94814e-07
2014-07-01	2.34348e-06	1.62501e-06	1.41001e-06	1.2362e-06	1.04106e-06	7.87436e-07	7.50057e-07
2014-07-02	3.0664e-06	2.16512e-06	1.88741e-06	1.66887e-06	1.4125e-06	1.08149e-06	1.03503e-06
2014-07-03	5.36076e-06	3.93539e-06	3.44181e-06	3.03345e-06	2.55943e-06	1.98242e-06	1.89059e-06
2014-07-04	1.05779e-05	7.90521e-06	6.8769e-06	6.0212e-06	5.0817e-06	3.82468e-06	3.65549e-06
2014-07-05	1.26036e-05	9.52523e-06	8.31406e-06	7.30963e-06	6.16591e-06	4.63926e-06	4.4221e-06
2014-07-06	9.10164e-06	6.88891e-06	6.0417e-06	5.3394e-06	4.50888e-06	3.42578e-06	3.25677e-06
2014-07-07	5.70487e-06	4.22339e-06	3.68684e-06	3.25765e-06	2.75217e-06	2.09042e-06	1.9953e-06
2014-07-08	9.75338e-06	7.50639e-06	6.64483e-06	5.90134e-06	5.0047e-06	3.81646e-06	3.63685e-06
2014-07-09	8.59079e-06	6.55957e-06	5.82635e-06	5.18486e-06	4.43102e-06	3.37224e-06	3.22351e-06
2014-07-10	4.95338e-06	3.59786e-06	3.17517e-06	2.81647e-06	2.40986e-06	1.84961e-06	1.76885e-06
2014-07-11	3.65442e-06	2.76987e-06	2.45551e-06	2.18585e-06	1.86905e-06	1.46869e-06	1.4016e-06
2014-07-12	2.97018e-06	2.09132e-06	1.83821e-06	1.62734e-06	1.37824e-06	1.06805e-06	1.01531e-06
2014-07-13	3.6674e-06	2.57474e-06	2.24363e-06	1.9754e-06	1.6566e-06	1.26199e-06	1.19774e-06
2014-07-14	4.1564e-06	2.89772e-06	2.50634e-06	2.1998e-06	1.84372e-06	1.38319e-06	1.31503e-06
2014-07-15	5.76506e-06	4.35345e-06	3.83844e-06	3.39391e-06	2.8786e-06	2.23991e-06	2.13616e-06
2014-07-16	2.79874e-06	2.06521e-06	1.81708e-06	1.61033e-06	1.37207e-06	1.06789e-06	1.01807e-06
2014-07-17	3.74183e-06	2.70746e-06	2.36853e-06	2.08959e-06	1.77269e-06	1.36147e-06	1.30162e-06
2014-07-18	7.4427e-06	5.55689e-06	4.89746e-06	4.3449e-06	3.70038e-06	2.87995e-06	2.75217e-06
2014-07-19	6.82043e-06	5.21669e-06	4.61132e-06	4.08652e-06	3.47201e-06	2.68897e-06	2.56679e-06
2014-07-20	4.92267e-06	3.65345e-06	3.19545e-06	2.81972e-06	2.38099e-06	1.7895e-06	1.71134e-06
2014-07-21	3.96475e-06	3.05227e-06	2.71961e-06	2.42726e-06	2.07071e-06	1.62821e-06	1.55396e-06
2014-07-22	4.61134e-06	3.5518e-06	3.1503e-06	2.80591e-06	2.39554e-06	1.85803e-06	1.77586e-06
2014-07-23	4.29212e-06	3.19404e-06	2.79907e-06	2.48046e-06	2.10735e-06	1.60831e-06	1.534e-06
2014-07-24	5.33078e-06	3.99203e-06	3.51943e-06	3.13525e-06	2.6821e-06	2.0674e-06	1.97412e-06
2014-07-25	4.59028e-06	3.67022e-06	3.29418e-06	2.95951e-06	2.54551e-06	2.03013e-06	1.93946e-06
2014-07-26	8.44707e-06	6.4781e-06	5.77254e-06	5.20304e-06	4.44222e-06	3.49936e-06	3.34542e-06
2014-07-28	1.37353e-05	1.06638e-05	9.4654e-06	8.44142e-06	7.1555e-06	5.48424e-06	5.22524e-06
2014-07-29	6.14018e-06	4.82605e-06	4.2887e-06	3.80897e-06	3.24446e-06	2.50476e-06	2.38442e-06
2014-07-30	4.77525e-06	3.64575e-06	3.21883e-06	2.87627e-06	2.45109e-06	1.9034e-06	1.81554e-06
2014-07-31	4.11721e-06	3.04311e-06	2.6395e-06	2.32639e-06	1.97039e-06	1.47734e-06	1.41005e-06
2014-08-01	1.11857e-05	8.76109e-06	7.77215e-06	6.92645e-06	5.90144e-06	4.56663e-06	4.36385e-06
2014-08-02	7.07878e-06	5.2999e-06	4.68529e-06	4.19889e-06	3.58142e-06	2.74876e-06	2.63913e-06
2014-08-03	8.76462e-06	6.91272e-06	6.13395e-06	5.46021e-06	4.64068e-06	3.57357e-06	3.4138e-06
2014-08-05	3.68487e-06	2.53874e-06	2.21233e-06	1.93008e-06	1.63877e-06	1.25945e-06	1.19978e-06
2014-08-06	4.25948e-06	3.04256e-06	2.63615e-06	2.31635e-06	1.97112e-06	1.50467e-06	1.43814e-06
2014-08-07	6.04518e-06	4.61637e-06	4.06616e-06	3.5994e-06	3.05444e-06	2.35523e-06	2.24205e-06
2014-08-08	7.98704e-06	6.0853e-06	5.34961e-06	4.74537e-06	4.02557e-06	3.11893e-06	2.97566e-06
2014-08-09	7.15695e-06	5.54733e-06	4.9237e-06	4.4001e-06	3.74656e-06	2.90853e-06	2.77304e-06
2014-08-10	6.22203e-06	5.02171e-06	4.53255e-06	4.09168e-06	3.50471e-06	2.74874e-06	2.62108e-06
2014-08-11	4.58523e-06	3.29407e-06	2.86723e-06	2.53649e-06	2.15058e-06	1.66042e-06	1.58892e-06
2014-08-12	5.91512e-06	4.58254e-06	4.11131e-06	3.7201e-06	3.2076e-06	2.60259e-06	2.49571e-06
2014-08-13	4.66138e-06	3.52656e-06	3.09251e-06	2.73306e-06	2.32023e-06	1.80558e-06	1.72874e-06
2014-08-14	4.58369e-06	3.3382e-06	2.90007e-06	2.55875e-06	2.17148e-06	1.69714e-06	1.63433e-06
2014-08-15	3.23467e-06	2.32656e-06	2.04172e-06	1.81888e-06	1.55897e-06	1.24868e-06	1.20451e-06
2014-08-16	2.39544e-06	1.80301e-06	1.57521e-06	1.38531e-06	1.17093e-06	9.10525e-07	8.66969e-07
2014-08-17	3.81013e-06	2.87964e-06	2.52569e-06	2.23791e-06	1.89279e-06	1.48159e-06	1.41335e-06
2014-08-18	2.56329e-06	1.85365e-06	1.60712e-06	1.41695e-06	1.19895e-06	9.34591e-07	8.93992e-07
2014-08-19	1.84028e-06	1.28278e-06	1.1021e-06	9.64638e-07	8.19119e-07	6.3053e-07	6.05368e-07
2014-08-20	1.81851e-06	1.27721e-06	1.10158e-06	9.72993e-07	8.2565e-07	6.41721e-07	6.13831e-07
2014-08-21	2.29751e-06	1.5889e-06	1.3753e-06	1.20491e-06	1.01432e-06	7.78829e-07	7.40325e-07
2014-08-22	5.38975e-06	4.10271e-06	3.58727e-06	3.1586e-06	2.66419e-06	2.05758e-06	1.95575e-06
2014-08-23	2.27656e-06	1.63618e-06	1.417e-06	1.24769e-06	1.05103e-06	8.15731e-07	7.76615e-07
2014-08-24	1.84676e-06	1.29715e-06	1.11693e-06	9.83528e-07	8.2973e-07	6.44813e-07	6.17356e-07
2014-08-25	1.57623e-06	1.1051e-06	9.40569e-07	8.19148e-07	6.86915e-07	5.23336e-07	5.00903e-07
2014-08-26	2.61129e-06	1.7928e-06	1.5422e-06	1.34552e-06	1.12981e-06	8.61731e-07	8.24483e-07
2014-08-27	2.27046e-06	1.73176e-06	1.51028e-06	1.32333e-06	1.11292e-06	8.51867e-07	8.11092e-07
2014-08-28	2.5164e-06	1.86175e-06	1.61716e-06	1.42124e-06	1.19563e-06	9.22364e-07	8.79846e-07
2014-08-29	4.3345e-06	3.09631e-06	2.66561e-06	2.33511e-06	1.95757e-06	1.4939e-06	1.42888e-06
2014-08-30	3.44558e-06	2.5195e-06	2.18723e-06	1.93807e-06	1.63519e-06	1.26855e-06	1.2151e-06
2014-08-31	2.78016e-06	2.05964e-06	1.8117e-06	1.60089e-06	1.35115e-06	1.04539e-06	9.93963e-07
2014-09-01	3.06081e-06	2.37177e-06	2.08543e-06	1.83736e-06	1.551e-06	1.18578e-06	1.129e-06
2014-09-02	3.25756e-06	2.49738e-06	2.19857e-06	1.94516e-06	1.64991e-06	1.25945e-06	1.20352e-06
2014-09-03	3.74963e-06	2.76938e-06	2.39907e-06	2.09547e-06	1.76352e-06	1.30785e-06	1.25028e-06
2014-09-04	5.0339e-06	3.78506e-06	3.31549e-06	2.9074e-06	2.44597e-06	1.83796e-06	1.74895e-06
2014-09-05	8.85997e-06	6.79851e-06	5.95827e-06	5.22928e-06	4.4063e-06	3.30879e-06	3.15951e-06
2014-09-06	1.2767e-05	9.56781e-06	8.34407e-06	7.30438e-06	6.13321e-06	4.60059e-06	4.38055e-06
2014-09-07	2.17063e-05	1.63241e-05	1.42267e-05	1.24371e-05	1.04095e-05	7.66339e-06	7.28351e-06
2014-09-08	8.24643e-06	6.24131e-06	5.48194e-06	4.81062e-06	4.04599e-06	3.04896e-06	2.89726e-06
2014-09-09	3.3211e-06	2.35393e-06	2.03511e-06	1.77833e-06	1.48461e-06	1.10779e-06	1.0545e-06
2014-09-10	3.06475e-06	2.21691e-06	1.91851e-06	1.67945e-06	1.4094e-06	1.05569e-06	1.00921e-06
2014-09-11	7.16885e-06	5.49832e-06	4.8504e-06	4.28092e-06	3.60008e-06	2.72838e-06	2.595e-06
2014-09-12	1.06211e-05	8.14952e-06	7.22803e-06	6.41e-06	5.41018e-06	4.08371e-06	3.89916e-06
2014-09-13	4.84498e-06	3.77523e-06	3.35399e-06	2.9802e-06	2.52467e-06	1.95212e-06	1.85853e-06
2014-09-14	9.07516e-06	6.89186e-06	6.0491e-06	5.32613e-06	4.45311e-06	3.29229e-06	3.13234e-06
2014-09-15	4.89219e-06	3.78712e-06	3.33796e-06	2.9313e-06	2.46186e-06	1.86071e-06	1.76561e-06
2014-09-16	5.50441e-06	4.13493e-06	3.63061e-06	3.18482e-06	2.66327e-06	1.97791e-06	1.88138e-06
2014-09-17	9.58058e-06	7.42032e-06	6.58381e-06	5.83164e-06	4.91176e-06	3.70045e-06	3.51983e-06
2014-09-18	1.58973e-05	1.19047e-05	1.03904e-05	9.08492e-06	7.5829e-06	5.58187e-06	5.29461e-06
2014-09-19	1.99794e-05	1.49334e-05	1.30288e-05	1.14193e-05	9.50511e-06	7.05618e-06	6.68063e-06
2014-09-20	3.05186e-05	2.35067e-05	2.05652e-05	1.80233e-05	1.50647e-05	1.11159e-05	1.0573e-05
2014-09-21	1.79764e-05	1.39179e-05	1.22647e-05	1.08423e-05	9.12742e-06	6.90963e-06	6.5761e-06
2014-09-22	1.43766e-06	9.45645e-07	8.04643e-07	6.80019e-07	5.60385e-07	3.85754e-07	3.69192e-07
2014-09-23	3.31832e-06	2.13915e-06	1.79857e-06	1.51977e-06	1.24023e-06	8.64844e-07	8.20903e-07
2014-09-24	1.26984e-05	9.38766e-06	8.18e-06	7.16926e-06	6.02073e-06	4.58507e-06	4.37269e-06
2014-09-25	2.80141e-06	1.99198e-06	1.73533e-06	1.52084e-06	1.27449e-06	9.67149e-07	9.24399e-07
2014-09-26	5.10896e-06	3.89474e-06	3.43079e-06	3.02998e-06	2.561e-06	1.99277e-06	1.90248e-06
2014-09-27	2.56542e-06	1.807e-06	1.57575e-06	1.3846e-06	1.16886e-06	9.01752e-07	8.64433e-07
2014-09-28	5.75878e-06	4.0553e-06	3.5075e-06	3.07837e-06	2.58548e-06	1.96584e-06	1.88723e-06
2014-09-29	8.14149e-06	5.92779e-06	5.15992e-06	4.52251e-06	3.79203e-06	2.87405e-06	2.74283e-06
2014-10-01	2.92785e-06	2.12514e-06	1.84712e-06	1.61553e-06	1.3495e-06	1.02348e-06	9.72452e-07
2014-10-02	1.0703e-05	8.00892e-06	7.02357e-06	6.22891e-06	5.29624e-06	4.06781e-06	3.91772e-06
2014-10-03	1.09049e-05	8.36219e-06	7.37914e-06	6.5398e-06	5.56282e-06	4.27462e-06	4.09318e-06
2014-10-04	2.46151e-05	1.88544e-05	1.65211e-05	1.45188e-05	1.22021e-05	9.04161e-06	8.58815e-06
2014-10-05	3.14163e-05	2.26186e-05	1.93918e-05	1.66955e-05	1.37769e-05	9.89443e-06	9.34503e-06
2014-10-06	1.31187e-05	9.69723e-06	8.44736e-06	7.3922e-06	6.17392e-06	4.52759e-06	4.29515e-06
2014-10-07	3.21027e-05	2.2923e-05	1.95501e-05	1.68437e-05	1.39152e-05	1.00077e-05	9.47778e-06
2014-10-08	5.33379e-06	3.9183e-06	3.37857e-06	2.9314e-06	2.45033e-06	1.84991e-06	1.75894e-06
2014-10-09	9.15222e-06	6.71242e-06	5.7878e-06	5.06144e-06	4.263e-06	3.21114e-06	3.07603e-06
2014-10-10	1.05268e-05	7.63009e-06	6.60131e-06	5.74832e-06	4.8276e-06	3.67754e-06	3.50039e-06
2014-10-11	8.9388e-06	6.49655e-06	5.63684e-06	4.92501e-06	4.15807e-06	3.13553e-06	2.98821e-06
2014-10-12	7.42776e-06	5.34113e-06	4.63784e-06	4.05294e-06	3.40048e-06	2.58165e-06	2.44886e-06
2014-10-13	6.58656e-06	4.54329e-06	3.92263e-06	3.41509e-06	2.86276e-06	2.18136e-06	2.07626e-06
2014-10-14	2.29645e-06	1.7157e-06	1.49521e-06	1.29666e-06	1.09106e-06	8.21176e-07	7.88933e-07
2014-10-15	2.97928e-06	2.214e-06	1.9475e-06	1.71594e-06	1.44649e-06	1.12008e-06	1.06354e-06
2014-10-16	2.35735e-06	1.68175e-06	1.47945e-06	1.3074e-06	1.10037e-06	8.48128e-07	8.09784e-07
2014-10-17	2.18909e-06	1.6641e-06	1.43455e-06	1.23782e-06	1.02989e-06	7.71631e-07	7.32606e-07
2014-10-18	9.69713e-06	7.15371e-06	6.25448e-06	5.49723e-06	4.62294e-06	3.50003e-06	3.33635e-06
2014-10-19	1.43757e-05	1.00205e-05	8.49618e-06	7.27345e-06	5.97201e-06	4.29601e-06	4.05322e-06
2014-10-20	3.80674e-06	2.64707e-06	2.26083e-06	1.93726e-06	1.61447e-06	1.16955e-06	1.11166e-06
2014-10-21	6.02212e-06	4.1282e-06	3.50319e-06	2.9808e-06	2.45106e-06	1.74264e-06	1.64752e-06
2014-10-22	4.22276e-06	3.21503e-06	2.76754e-06	2.38398e-06	1.98007e-06	1.46479e-06	1.38915e-06
2014-10-23	4.69489e-06	3.47818e-06	3.02269e-06	2.60772e-06	2.15329e-06	1.5538e-06	1.46829e-06
2014-10-24	1.30825e-05	9.66063e-06	8.44283e-06	7.36624e-06	6.13907e-06	4.59399e-06	4.35729e-06
2014-10-25	1.64183e-05	1.1866e-05	1.02787e-05	8.93469e-06	7.41213e-06	5.42088e-06	5.12651e-06
2014-10-26	1.0622e-05	7.69457e-06	6.62143e-06	5.72786e-06	4.75025e-06	3.52029e-06	3.33283e-06
2014-10-27	1.09023e-05	7.78638e-06	6.65003e-06	5.70522e-06	4.70476e-06	3.44852e-06	3.26393e-06
2014-10-29	1.77351e-05	1.30393e-05	1.12411e-05	9.74707e-06	8.09488e-06	5.93813e-06	5.59934e-06
2014-10-30	9.25193e-06	6.33827e-06	5.33637e-06	4.53343e-06	3.72675e-06	2.66506e-06	2.51292e-06
2014-10-31	1.00328e-05	7.38403e-06	6.3531e-06	5.50071e-06	4.56409e-06	3.36189e-06	3.17888e-06
2014-11-01	2.39729e-05	1.76987e-05	1.52251e-05	1.31894e-05	1.09255e-05	8.0267e-06	7.58853e-06
2014-11-02	3.18541e-05	2.24146e-05	1.90534e-05	1.62967e-05	1.34266e-05	9.6187e-06	9.07064e-06
2014-11-03	1.6174e-05	1.18181e-05	1.01431e-05	8.69966e-06	7.17859e-06	5.16204e-06	4.86746e-06
2014-11-04	1.33527e-05	9.62241e-06	8.22836e-06	7.03684e-06	5.80413e-06	4.19358e-06	3.95687e-06
2014-11-05	2.38554e-06	1.70176e-06	1.45214e-06	1.24105e-06	1.02508e-06	7.17624e-07	6.79185e-07
2014-11-06	1.53295e-06	1.09478e-06	9.3888e-07	8.02615e-07	6.67259e-07	4.72519e-07	4.48496e-07
2014-11-07	6.48919e-06	4.66347e-06	4.01994e-06	3.47429e-06	2.88782e-06	2.1348e-06	2.01951e-06
2014-11-08	1.39481e-05	1.01408e-05	8.69805e-06	7.48391e-06	6.18436e-06	4.43373e-06	4.1745e-06
2014-11-09	1.77783e-05	1.25456e-05	1.06631e-05	9.10802e-06	7.48123e-06	5.3223e-06	5.0102e-06
2014-11-10	2.87923e-05	2.10345e-05	1.80944e-05	1.56477e-05	1.29252e-05	9.31581e-06	8.77231e-06
2014-11-11	1.87379e-05	1.37371e-05	1.17751e-05	1.01303e-05	8.36278e-06	6.06115e-06	5.71636e-06
2014-11-12	3.01796e-05	2.14385e-05	1.84359e-05	1.59435e-05	1.31567e-05	9.54785e-06	8.97987e-06
2014-11-13	3.36646e-05	2.45161e-05	2.11769e-05	1.83714e-05	1.53278e-05	1.11432e-05	1.05303e-05
2014-11-14	2.67155e-05	1.95767e-05	1.68525e-05	1.4608e-05	1.21428e-05	8.71322e-06	8.19248e-06
2014-11-15	1.47468e-05	1.08101e-05	9.27712e-06	7.97771e-06	6.57139e-06	4.64195e-06	4.35703e-06
2014-11-16	2.02632e-05	1.4843e-05	1.28004e-05	1.107e-05	9.1628e-06	6.5682e-06	6.17811e-06
2014-11-17	1.58815e-05	1.10169e-05	9.30526e-06	7.92661e-06	6.47011e-06	4.55238e-06	4.27145e-06
2014-11-18	1.81817e-05	1.25782e-05	1.06588e-05	9.07829e-06	7.43247e-06	5.23236e-06	4.92144e-06
2014-11-19	1.48161e-05	1.00999e-05	8.51423e-06	7.20776e-06	5.90537e-06	4.15543e-06	3.91425e-06
2014-11-20	1.47425e-05	1.04781e-05	9.00772e-06	7.76627e-06	6.42429e-06	4.60993e-06	4.33387e-06
2014-11-21	1.30928e-05	9.04927e-06	7.66814e-06	6.52172e-06	5.3318e-06	3.77038e-06	3.54226e-06
2014-11-22	7.24322e-06	5.05251e-06	4.28104e-06	3.64277e-06	2.97067e-06	2.10246e-06	1.9753e-06
2014-11-23	4.82692e-05	3.27687e-05	2.73579e-05	2.32143e-05	1.8932e-05	1.3274e-05	1.24422e-05
2014-11-24	2.92117e-05	1.95239e-05	1.62747e-05	1.37707e-05	1.12024e-05	7.85737e-06	7.36808e-06
2014-11-25	3.48683e-06	2.41562e-06	2.05745e-06	1.77676e-06	1.47686e-06	1.08449e-06	1.02836e-06
2014-11-26	3.56515e-06	2.35271e-06	1.97659e-06	1.68629e-06	1.38661e-06	9.89509e-07	9.29337e-07
2014-11-27	8.66828e-06	5.98599e-06	5.06975e-06	4.33822e-06	3.57774e-06	2.56472e-06	2.41639e-06
2014-11-28	1.17527e-05	8.33593e-06	7.10866e-06	6.09994e-06	5.0349e-06	3.54526e-06	3.33496e-06
2014-11-29	1.48967e-05	1.02227e-05	8.63464e-06	7.341e-06	6.01674e-06	4.19777e-06	3.94532e-06
2014-11-30	1.46047e-05	9.54984e-06	7.85028e-06	6.59323e-06	5.35664e-06	3.66688e-06	3.44416e-06
2014-12-01	2.04451e-05	1.46624e-05	1.25723e-05	1.08182e-05	8.93663e-06	6.32403e-06	5.94841e-06
2014-12-02	3.10974e-05	2.207e-05	1.87426e-05	1.60644e-05	1.31801e-05	9.11372e-06	8.53071e-06
2014-12-03	2.10871e-05	1.45705e-05	1.22411e-05	1.03405e-05	8.38172e-06	5.74357e-06	5.38133e-06
2014-12-04	2.52397e-05	1.75546e-05	1.48707e-05	1.26668e-05	1.03291e-05	7.15655e-06	6.71091e-06
2014-12-05	5.24134e-05	3.57376e-05	2.97416e-05	2.5095e-05	2.03783e-05	1.40853e-05	1.3184e-05
2014-12-06	1.92118e-05	1.3134e-05	1.10375e-05	9.35103e-06	7.6275e-06	5.32792e-06	5.00979e-06
2014-12-07	8.73239e-06	5.82136e-06	4.90341e-06	4.16649e-06	3.40954e-06	2.388e-06	2.24281e-06
2014-12-08	7.20816e-06	4.88762e-06	4.14133e-06	3.52785e-06	2.90712e-06	2.11284e-06	1.99803e-06
2014-12-09	7.35495e-06	5.2712e-06	4.56795e-06	3.97148e-06	3.31062e-06	2.43389e-06	2.30061e-06
2014-12-10	6.59224e-06	4.5617e-06	3.90144e-06	3.3387e-06	2.76041e-06	2.02168e-06	1.91293e-06
2014-12-11	4.68239e-06	3.30142e-06	2.83953e-06	2.44988e-06	2.04267e-06	1.52583e-06	1.44885e-06
2014-12-13	3.46551e-06	2.37079e-06	2.0098e-06	1.70146e-06	1.39775e-06	1.01697e-06	9.60289e-07
2014-12-14	8.75475e-06	6.15777e-06	5.28296e-06	4.54969e-06	3.77597e-06	2.73772e-06	2.58609e-06
2014-12-15	1.00194e-05	6.74979e-06	5.6686e-06	4.80805e-06	3.94259e-06	2.7942e-06	2.63528e-06
2014-12-16	6.93702e-06	4.83052e-06	4.10898e-06	3.52092e-06	2.90805e-06	2.10918e-06	1.98934e-06
2014-12-17	7.81967e-06	5.44969e-06	4.64788e-06	4.00234e-06	3.32881e-06	2.42379e-06	2.29078e-06
2014-12-18	8.06502e-06	5.96239e-06	5.15699e-06	4.48673e-06	3.7419e-06	2.82466e-06	2.67279e-06
2014-12-19	3.15731e-06	2.23915e-06	1.92028e-06	1.66097e-06	1.39065e-06	1.03359e-06	9.83986e-07
2014-12-20	1.52086e-06	9.98423e-07	8.62349e-07	7.42535e-07	6.14025e-07	4.3403e-07	4.09061e-07
2014-12-21	2.6365e-06	1.67598e-06	1.43052e-06	1.23465e-06	1.0119e-06	7.37146e-07	6.97375e-07
2014-12-22	2.9134e-06	2.06961e-06	1.75914e-06	1.50259e-06	1.2436e-06	9.23896e-07	8.75727e-07
2014-12-23	3.88481e-06	2.62825e-06	2.22434e-06	1.89282e-06	1.56259e-06	1.14865e-06	1.08802e-06
2014-12-24	3.91133e-06	2.35466e-06	1.95069e-06	1.62813e-06	1.32203e-06	9.31143e-07	8.74389e-07
2014-12-25	2.74332e-06	2.00468e-06	1.70585e-06	1.43647e-06	1.17446e-06	8.1455e-07	7.62634e-07
2014-12-26	8.83064e-06	5.65227e-06	4.70833e-06	3.94737e-06	3.21069e-06	2.26643e-06	2.13376e-06
2014-12-27	8.67932e-06	6.07096e-06	5.1456e-06	4.40773e-06	3.62717e-06	2.60479e-06	2.45988e-06
2014-12-29	9.16116e-06	6.0694e-06	5.02369e-06	4.22806e-06	3.45706e-06	2.41441e-06	2.28504e-06
2014-12-30	1.06974e-05	7.39501e-06	6.27134e-06	5.3675e-06	4.4155e-06	3.18445e-06	3.00765e-06
2014-12-31	6.38307e-06	4.26929e-06	3.6031e-06	3.09085e-06	2.54244e-06	1.84915e-06	1.74833e-06
2015-01-01	1.22756e-05	8.2614e-06	7.01695e-06	6.02903e-06	4.98152e-06	3.64888e-06	3.44216e-06
2015-01-02	4.33446e-06	2.89902e-06	2.45285e-06	2.10578e-06	1.7403e-06	1.2611e-06	1.18759e-06
2015-01-03	1.88123e-06	1.21048e-06	1.03482e-06	8.87623e-07	7.40198e-07	5.56661e-07	5.30407e-07
2015-01-04	1.68593e-06	1.13184e-06	9.56035e-07	8.0592e-07	6.63262e-07	4.82247e-07	4.5679e-07
2015-01-05	3.21373e-06	2.07672e-06	1.74298e-06	1.45336e-06	1.18139e-06	8.28757e-07	7.80619e-07
2015-01-06	8.83347e-06	5.63633e-06	4.71905e-06	3.96397e-06	3.21185e-06	2.25282e-06	2.11548e-06
2015-01-07	1.45641e-05	9.95886e-06	8.4594e-06	7.227e-06	5.94512e-06	4.30361e-06	4.0651e-06
2015-01-09	2.6506e-06	1.87707e-06	1.60556e-06	1.3854e-06	1.16047e-06	8.75193e-07	8.34395e-07
2015-01-10	1.59387e-06	1.1035e-06	9.42978e-07	8.14428e-07	6.80501e-07	5.10969e-07	4.84027e-07
2015-01-11	1.29999e-06	8.5894e-07	7.31643e-07	6.26373e-07	5.23291e-07	3.88619e-07	3.70285e-07
2015-01-12	3.65104e-06	2.47734e-06	2.11638e-06	1.82662e-06	1.51752e-06	1.1339e-06	1.07565e-06
2015-01-13	4.10833e-06	2.78774e-06	2.39059e-06	2.06677e-06	1.72346e-06	1.29222e-06	1.22949e-06
2015-01-14	5.28929e-06	3.6164e-06	3.07689e-06	2.61926e-06	2.16334e-06	1.59762e-06	1.51392e-06
2015-01-15	5.34069e-06	3.72994e-06	3.1908e-06	2.74262e-06	2.27022e-06	1.67839e-06	1.58757e-06
2015-01-16	5.57317e-06	3.78676e-06	3.22009e-06	2.75574e-06	2.29429e-06	1.70468e-06	1.62187e-06
2015-01-17	7.89775e-06	5.30316e-06	4.48148e-06	3.79994e-06	3.13319e-06	2.30095e-06	2.17952e-06
2015-01-18	1.39181e-05	9.34152e-06	7.87612e-06	6.69036e-06	5.50177e-06	3.96142e-06	3.74019e-06
2015-01-19	1.82761e-05	1.26147e-05	1.05719e-05	8.94393e-06	7.28267e-06	5.05653e-06	4.74762e-06
2015-01-20	2.26523e-05	1.52268e-05	1.26517e-05	1.06953e-05	8.69795e-06	6.03642e-06	5.65877e-06
2015-01-21	1.11346e-05	7.65384e-06	6.40694e-06	5.42833e-06	4.42666e-06	3.09401e-06	2.90436e-06
2015-01-22	2.19493e-05	1.45821e-05	1.21619e-05	1.02694e-05	8.3873e-06	5.90714e-06	5.55506e-06
2015-01-23	1.11967e-05	7.77323e-06	6.61458e-06	5.63797e-06	4.63414e-06	3.31207e-06	3.1193e-06
2015-01-24	1.30101e-05	8.97084e-06	7.57789e-06	6.44071e-06	5.25379e-06	3.68739e-06	3.46374e-06
2015-01-25	7.98644e-06	5.27125e-06	4.4e-06	3.70239e-06	3.0101e-06	2.12667e-06	2.00024e-06
2015-01-26	7.00811e-06	4.88212e-06	4.09786e-06	3.50853e-06	2.87838e-06	2.0445e-06	1.92254e-06
2015-01-27	3.24599e-06	2.24038e-06	1.90702e-06	1.63158e-06	1.34799e-06	9.89375e-07	9.35109e-07
2015-01-28	5.74786e-06	4.1043e-06	3.50948e-06	3.01791e-06	2.49525e-06	1.83001e-06	1.72641e-06
2015-01-29	3.17257e-06	2.25348e-06	1.92348e-06	1.65217e-06	1.36886e-06	9.97679e-07	9.43812e-07
2015-01-30	1.61837e-05	1.05927e-05	8.71168e-06	7.26692e-06	5.86572e-06	4.03034e-06	3.7758e-06
2015-01-31	2.01007e-05	1.28832e-05	1.04679e-05	8.64044e-06	6.90674e-06	4.59903e-06	4.29267e-06
2015-02-01	4.84941e-06	3.27953e-06	2.73812e-06	2.30138e-06	1.86368e-06	1.26243e-06	1.18582e-06
2015-02-02	4.91883e-06	3.32167e-06	2.79585e-06	2.36501e-06	1.92367e-06	1.31271e-06	1.23373e-06
2015-02-03	5.07086e-06	3.67368e-06	3.13812e-06	2.67853e-06	2.19985e-06	1.58077e-06	1.49222e-06
2015-02-04	5.1022e-06	3.73428e-06	3.21653e-06	2.76613e-06	2.27781e-06	1.62466e-06	1.53453e-06
2015-02-05	9.98365e-06	6.99249e-06	5.92743e-06	5.03383e-06	4.10881e-06	2.86068e-06	2.69502e-06
2015-02-06	1.55339e-05	1.06259e-05	9.01741e-06	7.71e-06	6.31823e-06	4.46851e-06	4.20116e-06
2015-02-07	3.15833e-06	2.16688e-06	1.85075e-06	1.59062e-06	1.32064e-06	9.77828e-07	9.2773e-07
2015-02-08	1.79122e-06	1.18209e-06	9.92353e-07	8.38585e-07	6.89573e-07	5.03674e-07	4.76308e-07
2015-02-09	2.73892e-06	1.85502e-06	1.5733e-06	1.35258e-06	1.12073e-06	8.37099e-07	7.94135e-07
2015-02-10	3.28273e-06	2.22536e-06	1.89498e-06	1.6351e-06	1.35423e-06	9.98866e-07	9.44636e-07
2015-02-11	4.59419e-06	3.27103e-06	2.84526e-06	2.49017e-06	2.08235e-06	1.54019e-06	1.45463e-06
2015-02-12	7.84579e-06	5.70307e-06	4.95815e-06	4.30362e-06	3.59258e-06	2.67016e-06	2.53193e-06
2015-02-13	7.88306e-06	6.01778e-06	5.28873e-06	4.63186e-06	3.86974e-06	2.84588e-06	2.69126e-06
2015-02-14	1.15714e-05	8.55052e-06	7.44511e-06	6.49954e-06	5.41146e-06	3.91645e-06	3.69256e-06
2015-02-15	1.23639e-05	9.20532e-06	8.00713e-06	6.97557e-06	5.79492e-06	4.16682e-06	3.91723e-06
2015-02-16	2.35854e-05	1.66866e-05	1.41954e-05	1.2113e-05	9.89382e-06	6.85435e-06	6.41428e-06
2015-02-17	5.2912e-05	3.66567e-05	3.09175e-05	2.63603e-05	2.1633e-05	1.51272e-05	1.42021e-05
2015-02-18	8.97251e-06	6.30747e-06	5.33408e-06	4.58135e-06	3.77626e-06	2.69496e-06	2.5367e-06
2015-02-19	2.09553e-05	1.47617e-05	1.25754e-05	1.08062e-05	8.92996e-06	6.4591e-06	6.09418e-06
2015-02-20	1.97657e-05	1.40386e-05	1.20598e-05	1.04073e-05	8.62752e-06	6.34243e-06	5.98223e-06
2015-02-21	1.09138e-05	7.53225e-06	6.40845e-06	5.49099e-06	4.52397e-06	3.27915e-06	3.09115e-06
2015-02-22	8.34018e-06	4.81971e-06	3.87464e-06	3.19454e-06	2.55457e-06	1.74331e-06	1.63665e-06
2015-02-23	7.85416e-06	5.42798e-06	4.60621e-06	3.9233e-06	3.21992e-06	2.3317e-06	2.20414e-06
2015-02-24	8.20698e-06	5.60079e-06	4.79845e-06	4.13958e-06	3.40379e-06	2.51744e-06	2.3781e-06
2015-02-25	8.83892e-06	6.18181e-06	5.3381e-06	4.61654e-06	3.83884e-06	2.89035e-06	2.74437e-06
2015-02-26	1.25634e-05	8.57033e-06	7.31403e-06	6.28892e-06	5.18781e-06	3.79159e-06	3.58339e-06
2015-02-27	4.46271e-05	3.05286e-05	2.57725e-05	2.19644e-05	1.79483e-05	1.2679e-05	1.19282e-05
2015-02-28	1.84555e-05	1.24612e-05	1.0523e-05	8.93823e-06	7.29129e-06	5.10405e-06	4.80195e-06
2015-03-01	9.51078e-06	6.42938e-06	5.41827e-06	4.58269e-06	3.7377e-06	2.65036e-06	2.49968e-06
2015-03-02	4.3256e-06	2.96185e-06	2.49866e-06	2.12568e-06	1.74425e-06	1.23465e-06	1.16969e-06
2015-03-03	3.92529e-06	2.60513e-06	2.18849e-06	1.85541e-06	1.52467e-06	1.07945e-06	1.02248e-06
2015-03-04	5.71702e-06	4.07463e-06	3.48374e-06	2.98969e-06	2.4792e-06	1.82639e-06	1.73002e-06
2015-03-05	5.43107e-06	3.72488e-06	3.16345e-06	2.70719e-06	2.23215e-06	1.61179e-06	1.52307e-06
2015-03-06	1.00066e-05	7.16794e-06	6.14989e-06	5.3116e-06	4.40696e-06	3.23449e-06	3.05968e-06
2015-03-07	1.70766e-05	1.16451e-05	9.85623e-06	8.4163e-06	6.95542e-06	5.06034e-06	4.78235e-06
2015-03-08	2.51195e-05	1.62895e-05	1.35625e-05	1.14556e-05	9.38342e-06	6.75657e-06	6.39441e-06
2015-03-09	4.83284e-06	3.33995e-06	2.82808e-06	2.42886e-06	2.02509e-06	1.49298e-06	1.41384e-06
2015-03-10	6.14376e-06	4.21278e-06	3.58341e-06	3.0713e-06	2.55694e-06	1.91361e-06	1.81554e-06
2015-03-11	1.67252e-06	1.13247e-06	9.53006e-07	8.1015e-07	6.71765e-07	4.9428e-07	4.70231e-07
2015-03-12	2.94314e-06	1.88149e-06	1.55693e-06	1.30008e-06	1.06129e-06	7.52411e-07	7.0856e-07
2015-03-13	4.49122e-06	3.0369e-06	2.53453e-06	2.14285e-06	1.75694e-06	1.24784e-06	1.17566e-06
2015-03-14	9.27113e-06	6.18381e-06	5.14479e-06	4.30939e-06	3.49269e-06	2.43552e-06	2.28877e-06
2015-03-15	2.40597e-05	1.70646e-05	1.46164e-05	1.25834e-05	1.03565e-05	7.46306e-06	7.03052e-06
2015-03-16	3.77847e-05	2.66772e-05	2.28221e-05	1.95613e-05	1.60466e-05	1.13341e-05	1.06518e-05
2015-03-17	3.95485e-05	2.68999e-05	2.27065e-05	1.92515e-05	1.56769e-05	1.09231e-05	1.02642e-05
2015-03-18	4.4881e-05	2.88852e-05	2.38316e-05	1.98665e-05	1.60317e-05	1.10536e-05	1.03632e-05
2015-03-19	6.52147e-05	4.36883e-05	3.64963e-05	3.07941e-05	2.50918e-05	1.74608e-05	1.64363e-05
2015-03-20	4.28584e-05	2.99112e-05	2.5384e-05	2.17357e-05	1.79237e-05	1.27959e-05	1.20844e-05
2015-03-21	6.71649e-06	4.93122e-06	4.20869e-06	3.59055e-06	2.94589e-06	2.04874e-06	1.92675e-06
2015-03-22	4.23686e-06	2.67482e-06	2.20341e-06	1.81703e-06	1.45998e-06	1.00265e-06	9.42055e-07
2015-03-23	8.00612e-06	5.69952e-06	4.86593e-06	4.17673e-06	3.44243e-06	2.51608e-06	2.37443e-06
2015-03-24	1.16689e-05	8.52965e-06	7.37323e-06	6.42478e-06	5.34072e-06	3.94291e-06	3.72838e-06
2015-03-25	8.56714e-06	6.24443e-06	5.41358e-06	4.69715e-06	3.90998e-06	2.87286e-06	2.71635e-06
2015-03-26	2.15526e-05	1.49946e-05	1.27753e-05	1.09392e-05	9.00072e-06	6.38012e-06	6.01321e-06
2015-03-27	7.71552e-06	5.46427e-06	4.68866e-06	4.0379e-06	3.33999e-06	2.44416e-06	2.30919e-06
2015-03-28	5.62771e-06	3.94265e-06	3.38334e-06	2.91496e-06	2.41795e-06	1.74431e-06	1.65139e-06
2015-03-29	5.88817e-06	4.03668e-06	3.4415e-06	2.96291e-06	2.45402e-06	1.77545e-06	1.68443e-06
2015-03-30	1.61977e-06	1.1657e-06	9.96277e-07	8.54194e-07	7.13536e-07	5.30308e-07	5.06061e-07
2015-03-31	2.09636e-06	1.48233e-06	1.27178e-06	1.08776e-06	9.03658e-07	6.65916e-07	6.3262e-07
2015-04-01	1.30875e-06	9.02116e-07	7.79257e-07	6.71938e-07	5.64238e-07	4.22008e-07	4.02535e-07
2015-04-02	2.96645e-06	1.8264e-06	1.51949e-06	1.26051e-06	1.02302e-06	7.1627e-07	6.7571e-07
2015-04-03	2.46245e-06	1.62262e-06	1.37427e-06	1.16355e-06	9.57105e-07	6.9023e-07	6.52128e-07
2015-04-04	3.56624e-06	2.31255e-06	1.98096e-06	1.70911e-06	1.44082e-06	1.11556e-06	1.07202e-06
2015-04-05	4.42015e-06	2.60666e-06	2.13291e-06	1.75332e-06	1.4121e-06	9.89903e-07	9.34286e-07
2015-04-06	6.2708e-06	4.42383e-06	3.79605e-06	3.23565e-06	2.64811e-06	1.88911e-06	1.77838e-06
2015-04-07	5.92111e-06	4.31909e-06	3.76644e-06	3.28644e-06	2.72861e-06	2.01289e-06	1.90222e-06
2015-04-08	4.32307e-06	3.05241e-06	2.60305e-06	2.23677e-06	1.8393e-06	1.31871e-06	1.24533e-06
2015-04-09	7.54533e-06	5.48043e-06	4.76073e-06	4.13948e-06	3.45559e-06	2.5946e-06	2.46016e-06
2015-04-10	1.06221e-05	7.56144e-06	6.4886e-06	5.611e-06	4.66405e-06	3.4213e-06	3.23513e-06
2015-04-11	1.52543e-05	1.10451e-05	9.48591e-06	8.17134e-06	6.77978e-06	4.94855e-06	4.68243e-06
2015-04-12	2.62917e-06	1.73786e-06	1.46296e-06	1.23745e-06	1.01398e-06	7.16221e-07	6.7608e-07
2015-04-13	1.4035e-06	1.03761e-06	8.97644e-07	7.77428e-07	6.55171e-07	5.03124e-07	4.81825e-07
2015-04-14	5.60724e-06	4.23159e-06	3.69735e-06	3.22053e-06	2.69083e-06	2.01779e-06	1.91157e-06
2015-04-15	5.91375e-06	4.38344e-06	3.79749e-06	3.29627e-06	2.73941e-06	2.02116e-06	1.90638e-06
2015-04-16	2.05224e-06	1.4147e-06	1.20609e-06	1.03305e-06	8.56762e-07	6.28631e-07	5.93365e-07
2015-04-17	3.66925e-06	2.43368e-06	2.03886e-06	1.70733e-06	1.38077e-06	9.54706e-07	8.94761e-07
2015-04-18	3.98498e-06	2.85762e-06	2.44902e-06	2.08223e-06	1.70386e-06	1.21275e-06	1.14048e-06
2015-04-19	2.69311e-06	1.91249e-06	1.63257e-06	1.39193e-06	1.14115e-06	8.21203e-07	7.73514e-07
2015-04-20	2.46721e-06	1.71636e-06	1.45668e-06	1.23958e-06	1.02609e-06	7.52433e-07	7.12005e-07
2015-04-21	4.96218e-06	3.45732e-06	2.93523e-06	2.52579e-06	2.10048e-06	1.54874e-06	1.47111e-06
2015-04-22	5.86406e-06	4.31667e-06	3.7509e-06	3.28839e-06	2.77666e-06	2.10482e-06	2.00654e-06
2015-04-23	4.16938e-06	2.99079e-06	2.58837e-06	2.25025e-06	1.8883e-06	1.4259e-06	1.35447e-06
2015-04-24	3.70409e-06	2.75646e-06	2.40594e-06	2.11891e-06	1.78921e-06	1.34824e-06	1.27542e-06
2015-04-25	1.42844e-05	1.08326e-05	9.4922e-06	8.37445e-06	7.07825e-06	5.39033e-06	5.10314e-06
2015-04-26	3.49799e-06	2.50851e-06	2.15953e-06	1.86731e-06	1.55599e-06	1.13492e-06	1.06938e-06
2015-04-27	3.28794e-06	2.24338e-06	1.89217e-06	1.60607e-06	1.3146e-06	9.14151e-07	8.58461e-07
2015-04-28	2.37107e-06	1.60065e-06	1.34756e-06	1.14371e-06	9.36418e-07	6.53371e-07	6.13786e-07
2015-04-29	4.46035e-06	3.16854e-06	2.72538e-06	2.34412e-06	1.94179e-06	1.43344e-06	1.35743e-06
2015-04-30	9.85468e-06	6.39922e-06	5.35189e-06	4.52969e-06	3.69223e-06	2.63018e-06	2.47803e-06
2015-05-01	1.42602e-05	7.43268e-06	5.80707e-06	4.67625e-06	3.69332e-06	2.49004e-06	2.33453e-06
2015-05-02	2.79602e-06	2.07961e-06	1.79246e-06	1.55917e-06	1.3004e-06	9.6402e-07	9.15781e-07
2015-05-03	4.07974e-06	2.77268e-06	2.3516e-06	2.00385e-06	1.65002e-06	1.19899e-06	1.13478e-06
2015-05-04	8.77092e-06	6.59166e-06	5.73991e-06	5.02571e-06	4.18539e-06	3.11014e-06	2.94581e-06
2015-05-05	8.85048e-06	6.73973e-06	5.91519e-06	5.22841e-06	4.39093e-06	3.3025e-06	3.12329e-06
2015-05-06	5.57391e-06	4.11275e-06	3.58023e-06	3.11778e-06	2.62686e-06	1.9698e-06	1.87756e-06
2015-05-07	3.77804e-06	2.71997e-06	2.34924e-06	2.03758e-06	1.70725e-06	1.26542e-06	1.2037e-06
2015-05-08	2.69377e-06	1.8566e-06	1.57847e-06	1.34166e-06	1.11044e-06	7.92346e-07	7.52683e-07
2015-05-09	6.33871e-06	4.64475e-06	4.04258e-06	3.51246e-06	2.92918e-06	2.19532e-06	2.08173e-06
2015-05-10	2.93306e-06	2.09155e-06	1.83639e-06	1.60724e-06	1.36088e-06	1.05475e-06	1.01039e-06
2015-05-11	5.49834e-06	3.63061e-06	3.06941e-06	2.59556e-06	2.13048e-06	1.54649e-06	1.46667e-06
2015-05-12	6.67581e-06	4.90286e-06	4.25175e-06	3.69071e-06	3.08141e-06	2.30983e-06	2.19336e-06
2015-05-13	2.22345e-06	1.63658e-06	1.40622e-06	1.22268e-06	1.02197e-06	7.68178e-07	7.30709e-07
2015-05-14	3.16282e-06	2.22121e-06	1.86526e-06	1.58847e-06	1.30908e-06	9.45096e-07	8.96214e-07
2015-05-15	1.77035e-06	1.23877e-06	1.02708e-06	8.701e-07	7.16812e-07	5.12464e-07	4.86578e-07
2015-05-16	4.63108e-06	3.33062e-06	2.85012e-06	2.45883e-06	2.04812e-06	1.52741e-06	1.45242e-06
2015-05-17	1.26918e-06	9.01036e-07	7.78408e-07	6.78918e-07	5.73256e-07	4.42242e-07	4.22218e-07
2015-05-18	1.8829e-06	1.37972e-06	1.18685e-06	1.03376e-06	8.6589e-07	6.57698e-07	6.26389e-07
2015-05-19	3.72936e-06	2.78535e-06	2.38087e-06	2.07613e-06	1.73193e-06	1.30582e-06	1.2397e-06
2015-05-20	4.34903e-06	3.1157e-06	2.61679e-06	2.25992e-06	1.87082e-06	1.3885e-06	1.3177e-06
2015-05-21	4.90319e-06	3.5788e-06	3.09094e-06	2.69074e-06	2.25206e-06	1.71318e-06	1.62905e-06
2015-05-22	6.24277e-06	4.62685e-06	4.01685e-06	3.52985e-06	2.96244e-06	2.2626e-06	2.14912e-06
2015-05-23	1.65018e-06	1.16586e-06	9.92873e-07	8.67816e-07	7.28598e-07	5.47548e-07	5.19597e-07
2015-05-24	3.17302e-06	2.22107e-06	1.87192e-06	1.62414e-06	1.35128e-06	9.9906e-07	9.45375e-07
2015-05-25	3.55721e-06	2.51977e-06	2.16396e-06	1.88522e-06	1.58084e-06	1.20315e-06	1.14378e-06
2015-05-26	2.58572e-06	1.91885e-06	1.67196e-06	1.4682e-06	1.24193e-06	9.59903e-07	9.14863e-07
2015-05-27	1.48587e-06	1.07486e-06	9.19243e-07	8.03266e-07	6.75707e-07	5.16986e-07	4.9254e-07
2015-05-28	5.35223e-06	3.95562e-06	3.3736e-06	2.9457e-06	2.45833e-06	1.84748e-06	1.75326e-06
2015-05-29	3.79107e-06	2.77581e-06	2.33362e-06	2.0165e-06	1.6719e-06	1.22505e-06	1.16193e-06
2015-05-30	2.5159e-06	1.79236e-06	1.54065e-06	1.34146e-06	1.11935e-06	8.42457e-07	7.98554e-07
2015-05-31	3.04359e-06	2.28027e-06	1.97644e-06	1.71571e-06	1.43018e-06	1.07389e-06	1.0169e-06
2015-06-01	2.468e-06	1.7967e-06	1.53863e-06	1.3364e-06	1.11907e-06	8.40984e-07	7.99868e-07
2015-06-02	6.26923e-06	4.65697e-06	4.00025e-06	3.51916e-06	2.94098e-06	2.21651e-06	2.10413e-06
2015-06-03	2.74169e-06	1.89509e-06	1.59722e-06	1.38348e-06	1.14865e-06	8.41971e-07	7.99024e-07
2015-06-04	1.84488e-06	1.36372e-06	1.18574e-06	1.03259e-06	8.67463e-07	6.62921e-07	6.31347e-07
2015-06-05	4.09852e-06	3.00691e-06	2.59651e-06	2.25716e-06	1.88766e-06	1.41288e-06	1.34171e-06
2015-06-06	7.75849e-06	5.60556e-06	4.84985e-06	4.26433e-06	3.59832e-06	2.72142e-06	2.58944e-06
2015-06-07	2.05202e-06	1.40931e-06	1.21567e-06	1.05194e-06	8.83459e-07	6.68673e-07	6.37344e-07
2015-06-08	1.46815e-06	1.09064e-06	9.57231e-07	8.39341e-07	7.12382e-07	5.50731e-07	5.25779e-07
2015-06-09	1.9363e-06	1.46672e-06	1.29007e-06	1.13567e-06	9.60738e-07	7.38301e-07	7.03092e-07
2015-06-10	3.29102e-06	2.37457e-06	2.06306e-06	1.80077e-06	1.51348e-06	1.13756e-06	1.08152e-06
2015-06-11	2.37731e-06	1.72902e-06	1.50458e-06	1.32117e-06	1.10706e-06	8.34056e-07	7.90151e-07
2015-06-12	5.95737e-06	4.36723e-06	3.80793e-06	3.33386e-06	2.78779e-06	2.09501e-06	1.98992e-06
2015-06-13	8.69409e-06	6.68389e-06	5.93103e-06	5.253e-06	4.42436e-06	3.38031e-06	3.20924e-06
2015-06-14	2.38081e-06	1.76378e-06	1.52376e-06	1.31632e-06	1.08976e-06	7.8968e-07	7.42542e-07
2015-06-15	1.08623e-06	7.13934e-07	6.01794e-07	5.09496e-07	4.15806e-07	2.93048e-07	2.75732e-07
2015-06-16	1.9565e-06	1.37536e-06	1.1686e-06	9.9358e-07	8.05039e-07	5.66741e-07	5.29444e-07
2015-06-17	3.9727e-06	2.97199e-06	2.59705e-06	2.25898e-06	1.88724e-06	1.42659e-06	1.35243e-06
2015-06-18	2.3805e-06	1.81006e-06	1.59017e-06	1.39266e-06	1.16723e-06	8.82677e-07	8.35263e-07
2015-06-19	1.71446e-06	1.26052e-06	1.09941e-06	9.58438e-07	7.95355e-07	5.90202e-07	5.54983e-07
2015-06-20	2.29286e-06	1.66225e-06	1.45702e-06	1.27547e-06	1.06122e-06	7.90053e-07	7.42732e-07
2015-06-21	2.59695e-06	1.94551e-06	1.74252e-06	1.56068e-06	1.3291e-06	1.03634e-06	9.83008e-07
2015-06-22	3.34756e-06	2.44398e-06	2.15702e-06	1.90112e-06	1.60019e-06	1.22273e-06	1.15825e-06

## Sheet: TC OC EC data
Date	EC (µg/m3)	OC (µg/m3)	TC (µg/m3)
2014-06-15	0.0607119	0.754507	0.815219
2014-06-18	0.084374	0.911156	0.99553
2014-06-21	0.0583547	0.796642	0.854997
2014-06-24	0.00849414	0.571265	0.579759
2014-06-27	0.103931	0.756572	0.860504
2014-06-30	0.153863	1.08177	1.23563
2014-07-03	0.0416842	0.707411	0.749095
2014-07-06	0.307186	2.11857	2.42576
2014-07-09	0.214107	2.33048	2.54458
2014-07-12	0.19537	3.08601	3.28138
2014-07-15	0.110959	1.43438	1.54533
2014-07-18	0.159926	1.097	1.25692
2014-07-21	0.195681	1.47255	1.66823
2014-07-24	0.105489	2.01977	2.12525
2014-07-27	0.127066	2.60378	2.73084
2014-07-30	0.233733	2.74811	2.98184
2014-08-02	0.210275	1.9098	2.12008
2014-08-05	0.160868	1.62169	1.78256
2014-08-08	0.145513	1.35352	1.49903
2014-08-11	0.223321	1.35049	1.57381
2014-08-14	0.179805	1.14888	1.32868
2014-08-17	0.123662	0.771403	0.895065
2014-08-20	0.0646781	0.531163	0.595842
2014-08-23	0.105878	0.69791	0.803788
2014-08-26	0.0708306	0.569646	0.640476
2014-08-29	0.087621	0.908264	0.995885
2014-09-01	0.125416	0.985986	1.1114
2014-09-04	0.233239	1.33812	1.57136
2014-09-07	0.321414	2.15769	2.4791
2014-09-10	0.277309	1.98307	2.26038
2014-09-13	0.301722	2.14591	2.44763
2014-09-16	0.299044	2.4612	2.76024
2014-09-19	0.360403	2.48877	2.84917
2014-09-22	0.602083	4.46711	5.06919
2014-09-25	0.233994	1.20299	1.43698
2014-09-28	0.25374	0.893007	1.14675
2014-10-01	0.229653	1.19143	1.42108
2014-10-04	0.253131	1.43207	1.6852
2014-10-07	0.493912	3.51982	4.01374
2014-10-10	0.3719	2.30622	2.67812
2014-10-13	0.233883	1.17797	1.41185
2014-10-16	0.130013	0.728042	0.858055
2014-10-19	0.169648	0.904971	1.07462
2014-10-22	0.167093	0.954835	1.12193
2014-10-25	0.184886	1.03564	1.22053
2014-10-28	0.304745	1.31291	1.61765
2014-11-01	0.210832	0.906647	1.11748
2014-11-04	0.514958	2.56892	3.08387
2014-11-07	0.192488	0.791898	0.984385
2014-11-10	0.366849	1.57176	1.93861
2014-11-13	0.650013	3.33352	3.98353
2014-11-16	0.555391	3.81438	4.36977
2014-11-19	0.367154	2.52484	2.892
2014-11-22	0.329638	1.87215	2.20179
2014-11-25	0.605546	2.96857	3.57411
2014-11-28	0.194881	0.851847	1.04673
2014-12-01	0.272237	1.47259	1.74483
2014-12-04	0.472061	2.31095	2.78301
2014-12-07	0.679391	2.87691	3.5563
2014-12-10	0.19773	0.678063	0.875793
2014-12-13	0.0633277	0.386618	0.449946
2014-12-16	0.107683	0.658342	0.766025
2014-12-19	0.163241	0.538769	0.702009
2014-12-22	0.0213981	0.234174	0.255572
2014-12-25	0.0454812	0.36144	0.406921
2014-12-28	0.173175	0.684483	0.857658
2014-12-31	0.227842	0.860307	1.08815
2015-01-03	0.160642	0.772533	0.933175
2015-01-06	0	0.210205	0.210205
2015-01-09	0.20432	0.903402	1.10772
2015-01-12	0	0.15148	0.15148
2015-01-15	0.0642591	0.395071	0.45933
2015-01-18	0.0925668	0.5724	0.664966
2015-01-21	0.320067	1.67648	1.99655
2015-01-24	0.365473	1.19021	1.55568
2015-01-27	0.186606	0.766261	0.952867
2015-01-30	0.0597093	0.355526	0.415235
2015-02-02	0.218502	1.08201	1.30051
2015-02-05	0.0835321	0.435286	0.518819
2015-02-08	0.176495	0.960562	1.13706
2015-02-11	0.0363046	0.340635	0.37694
2015-02-14	0.153038	0.859307	1.01234
2015-02-17	0.468089	2.0226	2.49069
2015-02-20	0.566587	2.63824	3.20482
2015-02-23	0	1.41244	1.41244
2015-02-26	0.222991	0.895362	1.11835
2015-03-01	0.491452	2.67809	3.16954
2015-03-04	0.106272	0.648323	0.754595
2015-03-07	0.103606	0.665638	0.769244
2015-03-10	0.341421	1.72121	2.06263
2015-03-13	0.0963712	0.633803	0.730175
2015-03-16	0.301977	1.48594	1.78791
2015-03-19	0.984321	4.58381	5.56813
2015-03-22	0.922998	4.01811	4.94111
2015-03-25	0.167972	0.923463	1.09143
2015-03-28	0.249578	1.41566	1.66523
2015-03-31	0.0739595	0.595657	0.669617
2015-04-03	0	0.1764	0.1764
2015-04-06	0.0794462	0.497186	0.576632
2015-04-09	0.113422	0.713844	0.827266
2015-04-12	0.266434	1.48648	1.75292
2015-04-15	0.0517392	0.366494	0.418234
2015-04-18	0.0695074	0.477366	0.546874
2015-04-21	0.101957	0.713736	0.815693
2015-04-24	0.0996354	0.923307	1.02294
2015-04-27	0.183532	1.06717	1.2507
2015-04-30	0.0774085	0.612845	0.690254
2015-05-03	0.204458	1.35613	1.56059
2015-05-06	0.154277	1.3401	1.49438
2015-05-09	0.231005	1.0986	1.32961
2015-05-12	0.178396	1.28996	1.46836
2015-05-15	0.164156	1.00829	1.17245
2015-05-18	0.14748	0.926702	1.07418
2015-05-21	0.123941	0.892778	1.01672
2015-05-24	0.237432	1.01295	1.25038
2015-05-27	0.0991233	0.93927	1.03839
2015-05-30	0.0993989	0.705513	0.804912
2015-06-02	0.136798	0.894645	1.03144
2015-06-05	0.153173	0.892933	1.04611
2015-06-08	0.171239	1.22163	1.39287
2015-06-11	0.0867134	0.762769	0.849482
2015-06-14	0.181964	1.57417	1.75613
2015-06-17	0.0600257	0.576922	0.636948

## Sheet: NOx
Date	Nox (ppb)
2014-06-12	0.80875
2014-06-13	0.58
2014-06-14	0.719167
2014-06-15	0.863333
2014-06-16	2.49667
2014-06-17	0.670417
2014-06-18	2.04
2014-06-19	1.1775
2014-06-20	0.9825
2014-06-21	0.906667
2014-06-22
2014-06-23	1.05292
2014-06-24	0.692083
2014-06-25	0.827083
2014-06-26	3.93583
2014-06-27	1.43875
2014-06-28	1.49458
2014-06-29	1.57583
2014-06-30	1.09625
2014-07-01	1.23958
2014-07-02	1.52
2014-07-03	2.68792
2014-07-04	2.03875
2014-07-05	1.6125
2014-07-06	1.76667
2014-07-07	1.38214
2014-07-08
2014-07-09
2014-07-10
2014-07-11
2014-07-12
2014-07-13
2014-07-14
2014-07-15
2014-07-16
2014-07-17
2014-07-18
2014-07-19
2014-07-20
2014-07-21
2014-07-22
2014-07-23
2014-07-24
2014-07-25
2014-07-26	0.884167
2014-07-28	1.68958
2014-07-29	1.23458
2014-07-30	1.68375
2014-07-31	1.67708
2014-08-01	2.315
2014-08-02	0.936667
2014-08-03	2.04833
2014-08-05	1.69875
2014-08-06	2.00667
2014-08-07	1.88
2014-08-08	2.83833
2014-08-09	1.50333
2014-08-10	0.934167
2014-08-11	1.67375
2014-08-12	1.78
2014-08-13	1.53458
2014-08-14	2.01708
2014-08-15	1.68792
2014-08-16	0.879167
2014-08-17	1.98833
2014-08-18	1.655
2014-08-19	0.848333
2014-08-20	0.651667
2014-08-21	0.993333
2014-08-22	1.55625
2014-08-23	0.84125
2014-08-24	0.665
2014-08-25	0.863333
2014-08-26	0.929583
2014-08-27	1.12792
2014-08-28	1.05125
2014-08-29	1.01917
2014-08-30	0.336667
2014-08-31	0.505417
2014-09-01	0.363333
2014-09-02	0.87375
2014-09-03	0.852083
2014-09-04	0.467917
2014-09-05	0.9075
2014-09-06	0.967917
2014-09-07	1.20875
2014-09-08	1.64625
2014-09-09	1.32708
2014-09-10	0.695
2014-09-11	0.6475
2014-09-12	0.84
2014-09-13	0.28125
2014-09-14	0.229167
2014-09-15	0.44875
2014-09-16	0.628333
2014-09-17	0.871667
2014-09-18	1.32167
2014-09-19	1.1875
2014-09-20	1.3425
2014-09-21	1.15542
2014-09-22	0.0295833
2014-09-23	1.39917
2014-09-24	3.31875
2014-09-25	0.902083
2014-09-26	2.1775
2014-09-27	0.81875
2014-09-28	1.60958
2014-09-29	2.06792
2014-10-01	0.539583
2014-10-02	2.68875
2014-10-03	1.6975
2014-10-04	1.23083
2014-10-05	1.10125
2014-10-06	0.480417
2014-10-07	1.6075
2014-10-08	2.25733
2014-10-09
2014-10-10
2014-10-11
2014-10-12
2014-10-13
2014-10-14
2014-10-15
2014-10-16
2014-10-17	0.466667
2014-10-18	0.904583
2014-10-19	4.32917
2014-10-20	1.125
2014-10-21	1.93375
2014-10-22	0.822917
2014-10-23	0.35
2014-10-24	3.11375
2014-10-25	4.08333
2014-10-26	3.06417
2014-10-27	4.39917
2014-10-29	7.64
2014-10-30	3.74458
2014-10-31	2.84333
2014-11-01	7.78833
2014-11-02	8.28667
2014-11-03	3.29833
2014-11-04	4.11667
2014-11-05	0.20375
2014-11-06	0.745
2014-11-07	1.92958
2014-11-08	3.62167
2014-11-09	2.17125
2014-11-10	4.21375
2014-11-11	6.27833
2014-11-12	1.13542
2014-11-13	1.69167
2014-11-14	1.59
2014-11-15	0.675
2014-11-16	0.465
2014-11-17	1.46833
2014-11-18	0.749545
2014-11-19	0.826087
2014-11-20	1.72917
2014-11-21	1.455
2014-11-22	0.752917
2014-11-23	2.36917
2014-11-24	3.19042
2014-11-25	3.65043
2014-11-26	3.22208
2014-11-27	4.47542
2014-11-28	3.24708
2014-11-29	2.55542
2014-11-30	2.51792
2014-12-01	3.01833
2014-12-02	3.36417
2014-12-03	3.60917
2014-12-04	3.47708
2014-12-05	11.0179
2014-12-06	19.54
2014-12-07	6.305
2014-12-08	6.43208
2014-12-09	7.88708
2014-12-10	5.435
2014-12-11	4.58417
2014-12-13
2014-12-14
2014-12-15
2014-12-16
2014-12-17
2014-12-18
2014-12-19	2.78292
2014-12-20	1.305
2014-12-21	2.07167
2014-12-22	2.7075
2014-12-23	3.19792
2014-12-24	1.87708
2014-12-25	0.855
2014-12-26	5.39417
2014-12-27	3.6375
2014-12-29	6.44958
2014-12-30	6.29708
2014-12-31	2.65125
2015-01-01	3.15875
2015-01-02	1.92417
2015-01-03	1.39625
2015-01-04	1.34583
2015-01-05	1.63292
2015-01-06	2.05958
2015-01-07	7.53875
2015-01-09	2.23833
2015-01-10	1.34583
2015-01-11	0.785833
2015-01-12	2.86667
2015-01-13	4.17292
2015-01-14	4.24167
2015-01-15	4.33875
2015-01-16	4.87958
2015-01-17	4.95542
2015-01-18	5.97833
2015-01-19	4.845
2015-01-20	3.04417
2015-01-21	3.79542
2015-01-22	13.4792
2015-01-23	6.53708
2015-01-24	6.96667
2015-01-25	4.37708
2015-01-26	8.81583
2015-01-27	3.68458
2015-01-28	5.18292
2015-01-29	3.47833
2015-01-30	4.1775
2015-01-31	3.01583
2015-02-01	2.81875
2015-02-02	3.68375
2015-02-03	2.94917
2015-02-04	2.84792
2015-02-05	3.07125
2015-02-06	9.35542
2015-02-07	1.61417
2015-02-08	1.41083
2015-02-09	3.74458
2015-02-10	3.27083
2015-02-11	3.32667
2015-02-12	4.4575
2015-02-13	6.12375
2015-02-14	4.05
2015-02-15	1.46792
2015-02-16	1.65333
2015-02-17	6.6975
2015-02-18	5.60833
2015-02-19	12.1321
2015-02-20	10.8579
2015-02-21	6.24375
2015-02-22	3.40625
2015-02-23	5.14375
2015-02-24	6.53167
2015-02-25	7.09083
2015-02-26	6.98042
2015-02-27	5.60375
2015-02-28	5.65542
2015-03-01	4.39667
2015-03-02	4.17417
2015-03-03	3.03625
2015-03-04	4.84583
2015-03-05	5.51083
2015-03-06	5.67958
2015-03-07	7.81375
2015-03-08	10.4208
2015-03-09	3.49625
2015-03-10	4.7275
2015-03-11	1.84167
2015-03-12	2.075
2015-03-13	1.765
2015-03-14	1.63625
2015-03-15	2.49083
2015-03-16	3.51458
2015-03-17	3.96667
2015-03-18	4.16875
2015-03-19	8.0475
2015-03-20	10.4396
2015-03-21	1.59
2015-03-22	2.37458
2015-03-23	7.01583
2015-03-24	6.15667
2015-03-25	3.79042
2015-03-26	3.95958
2015-03-27	7.39625
2015-03-28	3.64417
2015-03-29	4.07333
2015-03-30	1.77958
2015-03-31	1.98458
2015-04-01	1.48417
2015-04-02	2.33667
2015-04-03	2.70583
2015-04-04	1.48
2015-04-05	1.60792
2015-04-06	2.30208
2015-04-07	2.86208
2015-04-08	3.71458
2015-04-09	8.33
2015-04-10	7.42083
2015-04-11	5.77917
2015-04-12	1.87958
2015-04-13	1.40708
2015-04-14	4.33917
2015-04-15	3.03042
2015-04-16	1.60792
2015-04-17	1.93708
2015-04-18	1.85042
2015-04-19	2.05958
2015-04-20	2.65167
2015-04-21	4.03
2015-04-22	3.58667
2015-04-23	3.01333
2015-04-24	3.22833
2015-04-25	7.03708
2015-04-26	1.96667
2015-04-27	2.15917
2015-04-28	2.33792
2015-04-29	3.56375
2015-04-30	4.41042
2015-05-01	2.47375
2015-05-02	2.34833
2015-05-03	2.16625
2015-05-04	3.76708
2015-05-05	2.71583
2015-05-06	4.36292
2015-05-07	3.26417
2015-05-08	1.96667
2015-05-09	2.4425
2015-05-10	1.66875
2015-05-11	3.03875
2015-05-12	5.40417
2015-05-13	1.98167
2015-05-14	2.42875
2015-05-15	1.58833
2015-05-16	2.62042
2015-05-17	1.00792
2015-05-18	1.55708
2015-05-19	2.56458
2015-05-20	3.40583
2015-05-21	3.52167
2015-05-22	3.64292
2015-05-23	1.4825
2015-05-24	2.27292
2015-05-25	3.13583
2015-05-26	2.10833
2015-05-27	1.50542
2015-05-28	3.97375
2015-05-29	2.10833
2015-05-30	1.53125
2015-05-31	1.78833
2015-06-01	1.80542
2015-06-02	3.86333
2015-06-03	1.675
2015-06-04	1.59667
2015-06-05	2.85292
2015-06-06	3.02333
2015-06-07	1.7575
2015-06-08	1.34167
2015-06-09	1.61917
2015-06-10	2.97958
2015-06-11	2.17708
2015-06-12	4.0375
2015-06-13	3.41417
2015-06-14	1.49458
2015-06-15	1.31708
2015-06-16	2.12083
2015-06-17	3.06542
2015-06-18	2.03625
2015-06-19	1.51
2015-06-20	2.00167
2015-06-21	1.77417
2015-06-22	2.5075

## Sheet: Radiocarbon data
Date	F14C
2014-06-15	0.825
2014-06-18	0.845
2014-06-21	0.845
2014-06-24	0.892
2014-06-27	0.892
2014-06-30	0.843
2014-07-03	0.843
2014-07-06	0.827
2014-07-09	0.856
2014-07-12	0.934
2014-07-15	0.893
2014-07-18	0.893
2014-07-21	0.916
2014-07-24	0.916
2014-07-27	0.931
2014-07-30	0.874
2014-08-02	0.954
2014-08-05	0.954
2014-08-08	0.923
2014-08-11	0.923
2014-08-14	0.869
2014-08-17	0.869
2014-08-20	0.906
2014-08-23	0.906
2014-08-26	0.904
2014-08-29	0.904
2014-09-01	0.921
2014-09-04	0.921
2014-09-07	0.854
2014-09-10	0.963
2014-09-13	0.951
2014-09-16	1.108
2014-09-19	0.886
2014-09-22	1.032
2014-09-25	0.895
2014-09-28	0.895
2014-10-01	0.912
2014-10-04	0.912
2014-10-07	0.816
2014-10-10	0.862
2014-10-13	0.848
2014-10-16	0.848
2014-10-19	0.853
2014-10-22	0.853
2014-10-25	0.783
2014-10-28	0.783
2014-11-01	0.776
2014-11-04	0.815
2014-11-07	0.845
2014-11-10	0.845
2014-11-13	0.77
2014-11-16	0.817
2014-11-19	0.854
2014-11-22	0.895
2014-11-25	0.615
2014-11-28	0.785
2014-12-01	0.785
2014-12-04	0.77
2014-12-07	0.663
2014-12-10	0.834
2014-12-13	0.834
2014-12-16	0.812
2014-12-19	0.812
2014-12-22
2014-12-25
2014-12-28	0.91954
2014-12-31	0.91954
2015-01-03	0.8442
2015-01-06	0.8442
2015-01-09	0.75566
2015-01-12	0.75566
2015-01-15	0.82274
2015-01-18	0.82274
2015-01-21	0.72665
2015-01-24	0.72665
2015-01-27	0.78925
2015-01-30	0.78925
2015-02-02	0.71579
2015-02-05	0.71579
2015-02-08	0.75455
2015-02-11	0.75455
2015-02-14	0.90717
2015-02-17	0.90717
2015-02-20
2015-02-23
2015-02-26	0.70577
2015-03-01	0.70577
2015-03-04	0.78591
2015-03-07	0.78591
2015-03-10	0.80554
2015-03-13	0.80554
2015-03-16	0.86516
2015-03-19	0.86516
2015-03-22	0.86213
2015-03-25	0.86213
2015-03-28	0.84101
2015-03-31	0.84101
2015-04-03	0.84775
2015-04-06	0.84775
2015-04-09	0.73643
2015-04-12	0.73643
2015-04-15	0.85053
2015-04-18	0.85053
2015-04-21	0.80385
2015-04-24	0.80385
2015-04-27	0.91204
2015-04-30	0.91204
2015-05-03	0.7859
2015-05-06	0.7859
2015-05-09	0.89173
2015-05-12	0.89173
2015-05-15	0.89284
2015-05-18	0.89284
2015-05-21	0.89404
2015-05-24	0.89404
2015-05-27	0.858
2015-05-30	0.858
2015-06-02	0.902
2015-06-05	0.902
2015-06-08	0.833
2015-06-11	0.833
2015-06-14	0.832
2015-06-17	0.832

## Sheet: PM10
Date	PM10 (µg/m3)
2014-06-15	7.59541
2014-06-16	12.0246
2014-06-17	6.82291
2014-06-18	10.4175
2014-06-19	9.2675
2014-06-20	6.38708
2014-06-21	7.56583
2014-06-22	7.98416
2014-06-23	6.21083
2014-06-24	5.95458
2014-06-25	6.42083
2014-06-26	7.49125
2014-06-27	8.37249
2014-06-28	12.2525
2014-06-29	9.37833
2014-06-30	9.70166
2014-07-01	8.9375
2014-07-02	9.26583
2014-07-03	10.8658
2014-07-04	18.1871
2014-07-05	21.3167
2014-07-06	16.4525
2014-07-07	13.6367
2014-07-08	20.9512
2014-07-09	19.8683
2014-07-10	18.4042
2014-07-11	13.8804
2014-07-12	10.7079
2014-07-13	8.7675
2014-07-14	10.3079
2014-07-15	14.3954
2014-07-16	11.3146
2014-07-17	12.1804
2014-07-18	16.0946
2014-07-19	14.1958
2014-07-20	12.1371
2014-07-21	14.9308
2014-07-22	16.2617
2014-07-23	12.9968
2014-07-24	13.7217
2014-07-25	15.6808
2014-07-26	16.6067
2014-07-27	19.4104
2014-07-28	22.5054
2014-07-29	14.2996
2014-07-30	11.2483
2014-07-31	10.5125
2014-08-01	19.675
2014-08-02	14.0762
2014-08-03	15.9654
2014-08-04	9.64913
2014-08-05	10.5275
2014-08-06	11.15
2014-08-07	12.3583
2014-08-08	12.2012
2014-08-09	11.6708
2014-08-10	11.9504
2014-08-11	12.1558
2014-08-12	9.5725
2014-08-13	11.4671
2014-08-14	9.15916
2014-08-15	8.655
2014-08-16	9.05625
2014-08-17	8.54333
2014-08-18	7.7125
2014-08-19	8.96124
2014-08-20	10.2542
2014-08-21	7.78374
2014-08-22	11.0346
2014-08-23	7.48875
2014-08-24	7.73458
2014-08-25	7.16083
2014-08-26	7.36333
2014-08-27	8.53166
2014-08-28	9.485
2014-08-29	9.80666
2014-08-30	10.4896
2014-08-31	8.34458
2014-09-01	8.97166
2014-09-02	9.59583
2014-09-03	10.1675
2014-09-04	10.4842
2014-09-05	14.5046
2014-09-06	18.0596
2014-09-07	24.3504
2014-09-08	16.1717
2014-09-09	10.3042
2014-09-10	10.5662
2014-09-11	15.7846
2014-09-12	18.35
2014-09-13	15.1233
2014-09-14	20.4717
2014-09-15	15.2429
2014-09-16	14.5038
2014-09-17	17.5029
2014-09-18	22.8404
2014-09-19	26.7896
2014-09-20	37.3817
2014-09-21	26.7912
2014-09-22	8.70625
2014-09-23	10.5646
2014-09-24	29.1792
2014-09-25	12.0867
2014-09-26	12.5467
2014-09-27	16.0221
2014-09-28	13.0121
2014-09-29	12.7117
2014-09-30	11.64
2014-10-01	10.8637
2014-10-02	15.3425
2014-10-03	23.2475
2014-10-04	33.5958
2014-10-05	34.1962
2014-10-06	19.2787
2014-10-07	29.5708
2014-10-08	12.7808
2014-10-09	14.9429
2014-10-10	19.0675
2014-10-11	18.1188
2014-10-12	12.5996
2014-10-13	10.2296
2014-10-14	7.13333
2014-10-15
2014-10-16
2014-10-17
2014-10-18
2014-10-19	12.0746
2014-10-20	15.2229
2014-10-21	10.8796
2014-10-22	5.85958
2014-10-23	6.49416
2014-10-24	20.0108
2014-10-25	17.0508
2014-10-26	13.1954
2014-10-27	15.795
2014-10-28	21.6573
2014-10-29
2014-10-30
2014-10-31	14.4154
2014-11-01	19.9712
2014-11-02	26.5221
2014-11-03	15.8229
2014-11-04	10.3508
2014-11-05	2.74042
2014-11-06	1.88042
2014-11-07	9.94333
2014-11-08	19.5208
2014-11-09	16.9779
2014-11-10	24.1792
2014-11-11	23.0754
2014-11-12	28.7404
2014-11-13	33.6079
2014-11-14	26.1129
2014-11-15	13.3096
2014-11-16	24.9533
2014-11-17	11.7494
2014-11-18
2014-11-19
2014-11-20
2014-11-21
2014-11-22
2014-11-23
2014-11-24
2014-11-25
2014-11-26
2014-11-27
2014-11-28
2014-11-29
2014-11-30
2014-12-01
2014-12-02
2014-12-03
2014-12-04
2014-12-05
2014-12-06
2014-12-07
2014-12-08
2014-12-09	8.92125
2014-12-10	10.1
2014-12-11	8.30666
2014-12-12	3.85208
2014-12-13	7.70041
2014-12-14	12.5817
2014-12-15	12.0167
2014-12-16	8.15875
2014-12-17	11.9025
2014-12-18	6.295
2014-12-19	8.95124
2014-12-20	6.34
2014-12-21	8.66166
2014-12-22	3.27417
2014-12-23	10.6096
2014-12-24	3.71333
2014-12-25	2.9875
2014-12-26	5.06791
2014-12-27	9.62375
2014-12-28	5.03291
2014-12-29	7.01208
2014-12-30	6.91333
2014-12-31	6.49041
2015-01-01	18.9338
2015-01-02	10.1858
2015-01-03	10.8037
2015-01-04	9.85458
2015-01-05	5.37166
2015-01-06	7.76749
2015-01-07	12.3325
2015-01-08	11.6533
2015-01-09	13.0192
2015-01-10	7.52583
2015-01-11	10.6692
2015-01-12	10.6987
2015-01-13	11.7525
2015-01-14	6.1975
2015-01-15	8.22958
2015-01-16	12.1712
2015-01-17	12.3933
2015-01-18	18.5325
2015-01-19	15.9267
2015-01-20	11.6529
2015-01-21	6.05666
2015-01-22	11.1862
2015-01-23	7.9825
2015-01-24	11.9704
2015-01-25	7.60166
2015-01-26	3.91417
2015-01-27	4.19083
2015-01-28	6.49782
2015-01-29	6.06913
2015-01-30	10.77
2015-01-31	10.3142
2015-02-01	5.5585
2015-02-02	5.33083
2015-02-03	4.4075
2015-02-04	5.02625
2015-02-05	7.39541
2015-02-06	11.2387
2015-02-07	11.1871
2015-02-08	8.05833
2015-02-09	9.345
2015-02-10	7.88791
2015-02-11	8.09541
2015-02-12	17.0954
2015-02-13	22.0138
2015-02-14	18.7108
2015-02-15	14.7871
2015-02-16	18.3579
2015-02-17	35.6029
2015-02-18	18.4571
2015-02-19	32.2416
2015-02-20	39.2442
2015-02-21	12.4921
2015-02-22	10.2429
2015-02-23	14.3296
2015-02-24	17.7858
2015-02-25	20.7883
2015-02-26	21.4771
2015-02-27	33.2692
2015-02-28	24.2342
2015-03-01	14.4637
2015-03-02	8.89583
2015-03-03	9.15667
2015-03-04	9.52541
2015-03-05	8.78416
2015-03-06	11.5767
2015-03-07	25.1333
2015-03-08	28.0333
2015-03-09	13.5792
2015-03-10	19.6729
2015-03-11	10.2167
2015-03-12	3.96791
2015-03-13	4.93125
2015-03-14	7.21916
2015-03-15	14.265
2015-03-16	25.3983
2015-03-17	27.9262
2015-03-18	21.2504
2015-03-19	35.9229
2015-03-20	34.4912
2015-03-21	7.3775
2015-03-22	3.22625
2015-03-23	13.2987
2015-03-24	20.4733
2015-03-25	19.0942
2015-03-26	21.005
2015-03-27	11.7025
2015-03-28	9.77208
2015-03-29	8.48333
2015-03-30	3.93083
2015-03-31	4.83826
2015-04-01	6.90333
2015-04-02	4.99625
2015-04-03	3.23833
2015-04-04	1.23375
2015-04-05	2.47375
2015-04-06	4.56833
2015-04-07	9.06833
2015-04-08	7.39458
2015-04-09	14.5979
2015-04-10	15.4342
2015-04-11	29.8233
2015-04-12	4.73541
2015-04-13	4.68782
2015-04-14	9.795
2015-04-15	7.90708
2015-04-16	8.835
2015-04-17	4.90833
2015-04-18	3.43542
2015-04-19	3.78458
2015-04-20	5.3475
2015-04-21	9.30916
2015-04-22	15.9767
2015-04-23	10.3167
2015-04-24	7.3475
2015-04-25	23.9308
2015-04-26	7.24167
2015-04-27	4.10833
2015-04-28	4.50542
2015-04-29	6.21833
2015-04-30	7.28541
2015-05-01	6.25792
2015-05-02	5.79666
2015-05-03	5.8025
2015-05-04	8.90666
2015-05-05	7.88083
2015-05-06	8.64833
2015-05-07	2.68
2015-05-08	2.65042
2015-05-09	4.9425
2015-05-10	2.48375
2015-05-11	4.61708
2015-05-12	5.80083
2015-05-13	2.52542
2015-05-14	3.07826
2015-05-15	-0.35087
2015-05-16	4.32958
2015-05-17	3.62291
2015-05-18	2.21565
2015-05-19	1.49909
2015-05-20	2.68833
2015-05-21	2.50958
2015-05-22	5.89273
2015-05-23	7.12083
2015-05-24	6.89666

## Sheet: Levoglucosan
Date	Levoglucosan (µg/m3)
2014-06-15	0.00395265
2014-06-18	0.00290536
2014-06-21	0.0112762
2014-06-24	0.0176207
2014-06-27	0.00930305
2014-06-30	0.0182595
2014-07-03	0.00763343
2014-07-06	0.0570228
2014-07-09	0.0149883
2014-07-12	0.0121938
2014-07-15	0.0455569
2014-07-18	0.00374853
2014-07-21	0.00676416
2014-07-24	0.00513988
2014-07-27	0.00918075
2014-07-30	0.0138666
2014-08-02	0.0073195
2014-08-05	0.0143499
2014-08-08	0.0600006
2014-08-11	0.00881194
2014-08-14	0.0096945
2014-08-17	0.00736261
2014-08-20	0.0043206
2014-08-23	0.0129016
2014-08-26	0.0146957
2014-08-29	0.00799241
2014-09-01	0.0148053
2014-09-04	0.0148774
2014-09-07	0.0295567
2014-09-10	0.0238977
2014-09-13	0.0165546
2014-09-16	0.014178
2014-09-19	0.0361888
2014-09-22	0.116293
2014-09-25	0.0156284
2014-09-28	0.0154265
2014-10-01	0.0161456
2014-10-04	0.0182508
2014-10-07	0.0192762
2014-10-10	0.0468938
2014-10-13	0.024503
2014-10-16	0.0188289
2014-10-19	0.0216379
2014-10-22	0.123735
2014-10-25	0.0226435
2014-10-28	0.0243354
2014-11-01	0.0513189
2014-11-04	0.0489815
2014-11-07	0.0194761
2014-11-10	0.0826701
2014-11-13	0.299291
2014-11-16	0.371836
2014-11-19	0.0855404
2014-11-22	0.0894188
2014-11-25	0.11545
2014-11-28	0.0310265
2014-12-01	0.172295
2014-12-04	0.238546
2014-12-07	0.309535
2014-12-10	0.0933175
2014-12-13	0.0445267
2014-12-16	0.0964568
2014-12-19	0.0503619
2014-12-22	0.0145919
2014-12-25	0.0379773
2014-12-28	0.0992831
2014-12-31	0
2015-01-03	0.0539546
2015-01-06	0.0125058
2015-01-09	0.110564
2015-01-12	0.00480786
2015-01-15	0.0181913
2015-01-18	0.0444483
2015-01-21	0.158164
2015-01-24	0.0844375
2015-01-27	0.067508
2015-01-30	0.0263044
2015-02-02	0.0747696
2015-02-05	0.0538427
2015-02-08	0.0748168
2015-02-11	0.0135603
2015-02-14	0.0597906
2015-02-17	0.15482
2015-02-20	0.17627
2015-02-23	0.155457
2015-02-26	0.0732908
2015-03-01	0.227668
2015-03-04	0.0226025
2015-03-07	0.0243753
2015-03-10	0.0671514
2015-03-13	0.0169905
2015-03-16	0.0371052
2015-03-19	0.607033
2015-03-22	0.235889
2015-03-25	0.0241968
2015-03-28	0.0332439
2015-03-31	0.017879
2015-04-03	0.00921098
2015-04-06	0.0330593
2015-04-09	0.0826906
2015-04-12	0.0282219
2015-04-15	0.0343637
2015-04-18	0.0165062
2015-04-21	0.0168422
2015-04-24	0.0192567
2015-04-27	0.0486274
2015-04-30	0.0727217
2015-05-03	0.0857341
2015-05-06	0.02879
2015-05-09	0.0144128
2015-05-12	0.0330876
2015-05-15	0.0126177
2015-05-18	0.00750838
2015-05-21	0.0365329
2015-05-24	0.0058085
2015-05-27	0.0317297
2015-05-30	0.00650724
2015-06-02	0.0243673
2015-06-05	0.00479788
2015-06-08	0.0123795
2015-06-11	0.00691761
2015-06-14	0.0119918
2015-06-17	0.00231675

## Sheet: Temperature
Date	Temp (°C)
2014-06-15	14.6334
2014-06-18	14.726
2014-06-21	14.5181
2014-06-24	11.5819
2014-06-27	12.5857
2014-06-30	14.2471
2014-07-03	13.8706
2014-07-06	17.7955
2014-07-09	20.3507
2014-07-12	21.5229
2014-07-15	14.9442
2014-07-18	17.1264
2014-07-21	19.6354
2014-07-24	20.6242
2014-07-27	21.317
2014-07-30	21.6993
2014-08-02	18.809
2014-08-05	19.8527
2014-08-08	17.6594
2014-08-11	16.9939
2014-08-14	15.7107
2014-08-17	14.9127
2014-08-20	12.7976
2014-08-23	12.5383
2014-08-26	11.3631
2014-08-29	13.7496
2014-09-01	13.4491
2014-09-04	14.0101
2014-09-07	15.4192
2014-09-10	14.6232
2014-09-13	13.5226
2014-09-16	14.5739
2014-09-19	14.3538
2014-09-22	13.8432
2014-09-25	9.0666
2014-09-28	12.1574
2014-10-01	12.1947
2014-10-04	12.2482
2014-10-07	11.5084
2014-10-10	11.6903
2014-10-13	11.7487
2014-10-16	9.03631
2014-10-19	9.93233
2014-10-22	11.7159
2014-10-25	8.96895
2014-10-28	10.4169
2014-11-01	7.76181
2014-11-04	11.2235
2014-11-07	7.7232
2014-11-10	7.44255
2014-11-13	8.09138
2014-11-16	7.92642
2014-11-19	6.15449
2014-11-22	3.57592
2014-11-25	4.98409
2014-11-28	4.73715
2014-12-01	1.6063
2014-12-04	0.308851
2014-12-07	2.45793
2014-12-10	2.51524
2014-12-13	2.76625
2014-12-16	2.52412
2014-12-19	3.46433
2014-12-22	4.08382
2014-12-25	5.11339
2014-12-28	-3.21616
2014-12-31	-4.02235
2015-01-03	4.13243
2015-01-06	2.00474
2015-01-09	1.62462
2015-01-12	3.42688
2015-01-15	3.31372
2015-01-18	2.88127
2015-01-21	0.243375
2015-01-24	-1.14709
2015-01-27	-0.179063
2015-01-30	1.04057
2015-02-02	-0.060625
2015-02-05	-3.6095
2015-02-08	-0.878292
2015-02-11	2.5085
2015-02-14	0.343365
2015-02-17	-0.0190486
2015-02-20	1.85869
2015-02-23	1.64929
2015-02-26	1.90849
2015-03-01	2.40736
2015-03-04	1.93282
2015-03-07	2.59948
2015-03-10	5.8472
2015-03-13	4.73139
2015-03-16	2.98914
2015-03-19	6.05058
2015-03-22	3.50328
2015-03-25	1.92709
2015-03-28	3.31033
2015-03-31	4.4314
2015-04-03	2.45958
2015-04-06	3.60257
2015-04-09	5.52272
2015-04-12	8.90296
2015-04-15	5.02205
2015-04-18	6.34337
2015-04-21	8.14893
2015-04-24	9.9041
2015-04-27	8.02081
2015-04-30	5.91082
2015-05-03	6.76069
2015-05-06	9.86021
2015-05-09	9.42444
2015-05-12	8.58036
2015-05-15	10.1032
2015-05-18	8.37901
2015-05-21	8.95297
2015-05-24	9.45977
2015-05-27	9.12323
2015-05-30	9.66302
2015-06-02	10.1514
2015-06-05	11.2836
2015-06-08	13.674
2015-06-11	11.9079
2015-06-14	14.7173
2015-06-17	11.5226
